# Supplementary material
Source: PubMed Central journal article supplement (PMC4855078)

# Supplementary Figures

A)

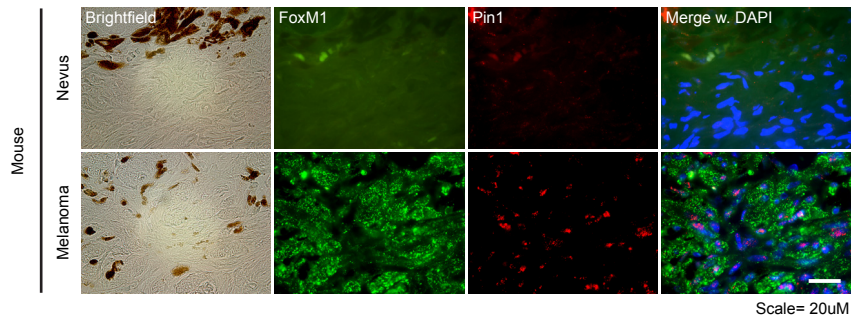

B)

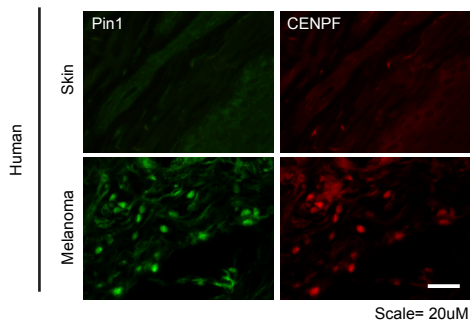

C)

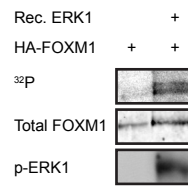

D)

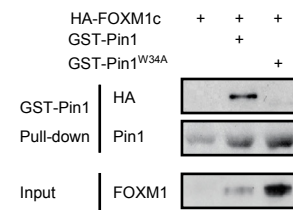

E)

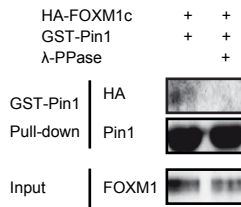

F)

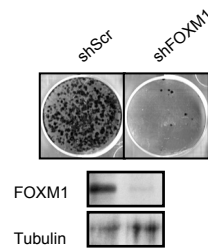

G)

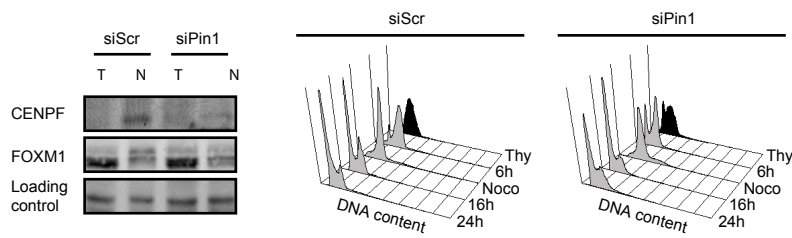

# Supplementary Figures

H)  
 Human pldlisvpfgnsspsdidvpkpgs**sp**epqvs<sup>g</sup>laa  
 |.|.|.|.|.|.|.|.|.|.|.|.|.|.|.|.|.|.|.|.|.|.|.|.|.|.|.|.  
 Mouse pfdlasdpfgspppphvegpkpgsp**el**qipslsa

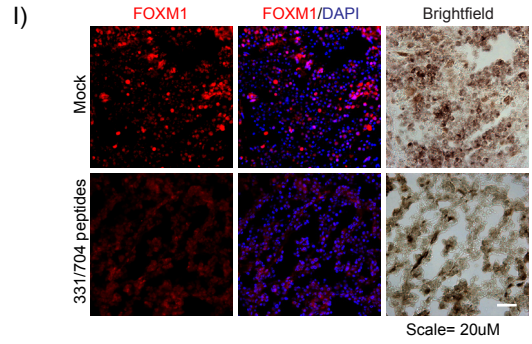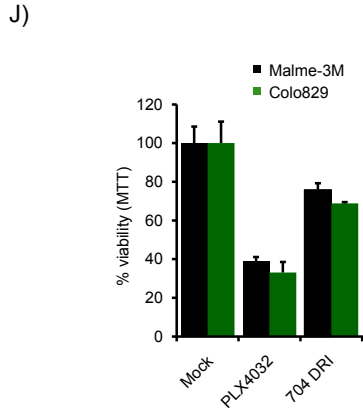

K)

|                                                                                                                                                                                  |
|----------------------------------------------------------------------------------------------------------------------------------------------------------------------------------|
| Non-mutated sequences in EM5 melanoid                                                                                                                                            |
| Whole genes:<br>PTEN, p53                                                                                                                                                        |
| Cancer hotspots:<br>AKT1, ALK, APC, CTNBB1, EGFR, ERBB2, EZH2, FBWX7, FOXL2, GNA11, GNAQ, GNAS, HRAS, IDH1, IDH2, KIT, KRAS, MET, NOTCH1, NRAS, PDGFRa, PIK3CA,RET, SMAD4, STK11 |
| SNPs: 1p, 8p, 19q, APC, ARID1A, ATM, BRCA1, BRCA2, CDKN2A, FHIT, PTEN, RB1, SMAD4, STK11, TP53, VHL                                                                              |

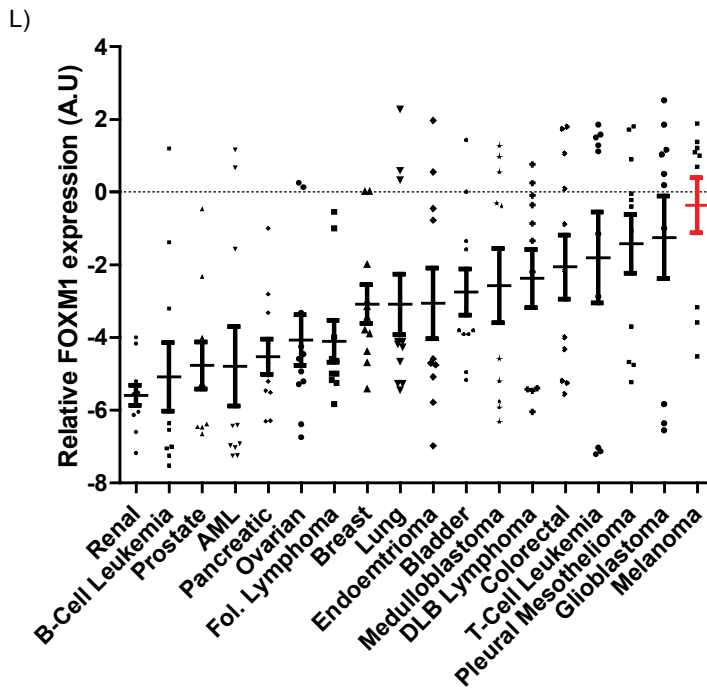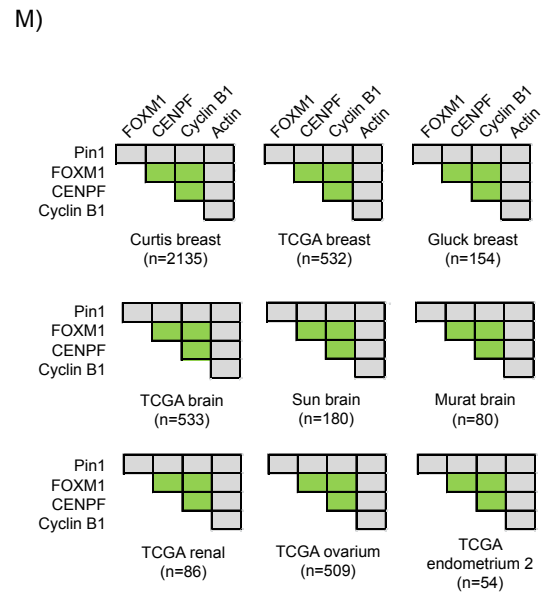

Supplement: onc2015282x2.pdf [file onc2015282x2.pdf]
